# Supplementary material for: The Prevalence and Risk Factors Associated with Iodine Deficiency in Canadian Adults
Source: MDPI journal article supplement (doi:10.3390/nu14132570), 2022-06-21
Supplement: s1 [file s1]

## SUPPLEMENTAL INFORMATION

### The Prevalence and Risk Factors Associated with Iodine Deficiency in Canadian Adults

Stellena Mathiapparanam,<sup>1</sup> Adriana Nori de Macedo,<sup>1,2</sup> Andrew Mente,<sup>3</sup> Paul Poirier,<sup>4</sup> Scott A. Lear,<sup>5</sup> Andreas Wielgosz,<sup>6</sup> Koon Teo,<sup>3</sup> Salim Yusuf,<sup>3</sup> Philip Britz-McKibbin<sup>1\*</sup>

<sup>1</sup> *Department of Chemistry and Chemical Biology, McMaster University, Hamilton, ON, Canada*

<sup>2</sup> *Departamento de Química, Universidade Federal de Minas Gerais, Belo Horizonte, Minas Gerais, Brazil*

<sup>3</sup> *Population Health Research Institute, McMaster University and Hamilton Health Sciences, Hamilton, Ontario, Canada*

<sup>4</sup> *Faculté de Pharmacie, Institut Universitaire de Cardiologie et de Pneumologie de Québec, Université Laval, Québec City, Québec, Canada*

<sup>5</sup> *Faculty of Health Sciences, Simon Fraser University, Burnaby and Division of Cardiology, Providence Health Care, Vancouver, British Columbia, Canada*

<sup>6</sup> *University of Ottawa Heart Institute, Ottawa, Ontario, Canada*

\* Corresponding author: Philip Britz-McKibbin, [britz@mcmaster.ca](mailto:britz@mcmaster.ca)

**Table S1-Table S6, Figure S1**

**Table S1.** Characteristics of PURE-24USE participants categorized by study regions, including Hamilton, Vancouver, Quebec City and Ottawa.

| Predictor Variable                                                    | Study Site       |                   |                     |                |               |
|-----------------------------------------------------------------------|------------------|-------------------|---------------------|----------------|---------------|
|                                                                       | Hamilton (n=217) | Vancouver (n=200) | Quebec City (n=200) | Ottawa (n=183) | Total (n=800) |
| 24 h iodine concentration (µg/L) – median ± IQR                       | 122 ± 115        | 91 ± 84           | 95 ± 87             | 128 ± 106      | 111 ± 98      |
| 24 h daily iodine excretion (µg/day) – median ± IQR                   | 272 ± 190        | 194 ± 170         | 191 ± 142           | 267 ± 242      | 226 ± 191     |
| 24 h thiocyanate concentration (µg/L) – median ± IQR <sup>a</sup>     | 658 ± 779        | 649 ± 656         | 846 ± 841           | 668 ± 904      | 680 ± 811     |
| 24 h daily thiocyanate excretion (mg/day) – median ± IQR <sup>a</sup> | 1.3 ± 1.5        | 1.3 ± 1.0         | 1.7 ± 1.8           | 1.4 ± 1.9      | 1.4 ± 1.5     |
| 24 h nitrate concentration (mg/L) – median ± IQR                      | 67 ± 57          | 79 ± 72           | 82 ± 58             | 67 ± 71        | 74 ± 64       |
| 24 h daily nitrate excretion (mg/day) – median ± IQR                  | 133 ± 104        | 167 ± 154         | 164 ± 123           | 137 ± 132      | 150 ± 126     |
| 24 h sodium concentration (g/L) – median ± IQR                        | 1.5 ± 1.1        | 1.3 ± 1.1         | 1.8 ± 1.2           | 1.3 ± 1.0      | 1.4 ± 1.1     |
| 24 h daily sodium excretion (g/day) – median ± IQR                    | 3.0 ± 1.6        | 3.0 ± 1.7         | 3.7 ± 2.0           | 2.7 ± 1.4      | 3.1 ± 1.7     |
| Age – years, – median ± IQR                                           | 62 ± 13          | 59 ± 12           | 59 ± 14             | 64 ± 13        | 61 ± 12       |
| BMI (kg/m <sup>2</sup> ) – median ± IQR <sup>b</sup>                  | 28 ± 7.0         | 26 ± 6.9          | 27 ± 6.4            | 27 ± 6.2       | 27 ± 6.7      |
| Sex – female:male                                                     | 113:104          | 103:97            | 96:104              | 100:83         | 412:388       |
| 24 h urine volume (L)                                                 | 2.1 ± 1.2        | 2.2 ± 1.1         | 2.1 ± 1.2           | 2.3 ± 1.4      | 2.1 ± 1.2     |
| Iodine supplement – no./total no. (%)                                 | 41/217 (19)      | 31/200 (16)       | 3/200 (2)           | 28/183 (15)    | 103/800 (13)  |
| Thyroxine (T4) intake – no./total no. (%)                             | 11/217 (5)       | 11/200 (6)        | 21/200 (11)         | 18/183 (10)    | 61/800 (8)    |
| Hypertension/high blood pressure diagnosis – no./total no. (%)        | 52/217 (24)      | 35/200 (18)       | 36/200 (18)         | 44/183 (24)    | 167/800 (21)  |
| Dairy intake (g/day) – median ± IQR <sup>c</sup>                      | 345 ± 359        | 285 ± 330         | 379 ± 397           | 320 ± 321      | 329 ± 359     |
| Starch intake (g/day) – median ± IQR <sup>c</sup>                     | 299 ± 210        | 290 ± 193         | 299 ± 192           | 314 ± 237      | 299 ± 208     |
| Sodium intake from ffq (mg) – median ± IQR <sup>d</sup>               | 2.8 ± 1.4        | 2.5 ± 1.3         | 3.0 ± 1.4           | 2.7 ± 1.2      | 2.7 ± 1.3     |
| Current alcohol consumer – no./total no. (%)                          | 176/217 (81)     | 152/200 (76)      | 170/200 (85)        | 155/183 (85)   | 653/800 (82)  |
| Current smoker – no./total no. (%)                                    | 19/216 (9)       | 12/200 (6)        | 16/200 (8)          | 12/179 (7)     | 59/800 (7)    |
| AHEI Score <sup>e</sup>                                               | 38 ± 11          | 42 ± 14           | 37 ± 12             | 41 ± 14        | 39 ± 13       |
| Location – urban:rural                                                | 211:6            | 186:14            | 106:94              | 182:1          | 685:115       |

<sup>a</sup> Hamilton: n=204, Vancouver: n=184, Quebec City: n=152, Ottawa: n=173, and total: n=713.

<sup>b</sup> Hamilton: n=204, Vancouver: n=198, Quebec City: n=195, Ottawa: n=179, and total: n=776.

<sup>c</sup> Hamilton: n=207, Vancouver: n=173, Quebec City: n=197, Ottawa: n=182, and total: n=759.

<sup>d</sup> Hamilton: n=213, Vancouver: n=174, Quebec City: n=199, Ottawa: n=181, and total: n=767.

<sup>e</sup> Hamilton: n=212, Vancouver: n=174, Quebec City: n=199, Ottawa: n=181, and total: n=766.

**Table S2.** Summary of figures of merit of CE assay for the determination of urinary iodide, nitrate and thiocyanate from PURE-24USE study participants (n=800).

| Figures of Merit                                | Iodide <sup>a</sup>     | Nitrate <sup>b</sup>   | Thiocyanate <sup>c</sup> |
|-------------------------------------------------|-------------------------|------------------------|--------------------------|
| LOD (S/N = 3)                                   | 0.020 $\mu\text{mol/L}$ | 0.64 $\mu\text{mol/L}$ | 0.12 $\mu\text{mol/L}$   |
| LOQ (S/N = 10)                                  | 0.070 $\mu\text{mol/L}$ | 2.12 $\mu\text{mol/L}$ | 0.40 $\mu\text{mol/L}$   |
| Linearity ( $R^2$ )                             | 0.996                   | 0.999                  | 0.997                    |
| Sensitivity ( $\mu\text{mol/L}$ ) <sup>-1</sup> | 0.045                   | 0.006                  | 0.014                    |
| Reproducibility (CV) <sup>d</sup>               | 5.7%                    | 7.7%                   | 5.3%                     |
| Missing data/Non-detects <sup>e</sup>           | 2.0%                    | 0%                     | 11%                      |

<sup>a</sup> Calibration curve was normalized to NDS (20  $\mu\text{mol/L}$ ) over a 17-fold (6 calibrants) linear dynamic range, respectively. Calibrant concentrations were 0.15, 0.20, 0.50, 1.00, 1.80, 2.60  $\mu\text{mol/L}$ .

<sup>b</sup> Calibration curve was normalized to NDS (20  $\mu\text{mol/L}$ ) over a 400-fold (6 calibrants) linear dynamic range, respectively. Calibrant concentrations were 0, 50, 100, 200, 300, 400  $\mu\text{mol/L}$ .

<sup>c</sup> Calibration curve was normalized to NDS (20  $\mu\text{mol/L}$ ) over a 24-fold (6 calibrants) linear dynamic range, respectively. Calibrant concentrations were 0.5, 1.0, 2.0, 4.0, 8.0, 12.0  $\mu\text{mol/L}$ .

<sup>d</sup> Reproducibility was assessed based on repeated analysis of a pooled urine samples from PURE as QC every batch of 10 runs.

<sup>e</sup> Missing data due to concentrations below method detection limit or matrix spectral interferences from PURE cohort (n=800).

**Table S3.** Characteristics of PURE-24USE participants categorized by quintiles using 24 h UIE ( $\mu\text{g/day}$ ).

| Predictor Variable                                                        | Quintiles                             |                                                |
|---------------------------------------------------------------------------|---------------------------------------|------------------------------------------------|
|                                                                           | Q1 (<133.5 $\mu\text{g/day}$ ; n=160) | Q2-5 ( $\geq 133.5$ $\mu\text{g/day}$ ; n=640) |
| 24 h daily iodine excretion ( $\mu\text{g/day}$ ) – median $\pm$ IQR      | 97 $\pm$ 40                           | 263 $\pm$ 184                                  |
| 24 h daily thiocyanate excretion (mg/day) – median $\pm$ IQR <sup>a</sup> | 1.1 $\pm$ 1.0                         | 1.5 $\pm$ 1.6                                  |
| 24 h daily nitrate excretion (mg/day) – median $\pm$ IQR                  | 148 $\pm$ 139                         | 151 $\pm$ 122                                  |
| 24 h daily sodium excretion (g/day) – median $\pm$ IQR                    | 2.7 $\pm$ 1.5                         | 3.2 $\pm$ 1.7                                  |
| Age – years, – median $\pm$ IQR                                           | 60 $\pm$ 13                           | 61 $\pm$ 13                                    |
| BMI ( $\text{kg/m}^2$ ) – median $\pm$ IQR <sup>b</sup>                   | 26 $\pm$ 7                            | 27 $\pm$ 6                                     |
| Sex – female:male                                                         | 88:72                                 | 324:316                                        |
| 24 h urine volume (L)                                                     | 1.9 $\pm$ 1.3                         | 2.2 $\pm$ 1.1                                  |
| <b>Iodine supplement – no./total no. (%)</b>                              | <b>6/160 (4)</b>                      | <b>97/640 (15)</b>                             |
| <b>Thyroxine (T4) intake – no./total no. (%)</b>                          | <b>4/160 (3)</b>                      | <b>57/640 (9)</b>                              |
| <b>Dairy intake (g/day) – median <math>\pm</math> IQR<sup>c</sup></b>     | <b>246 <math>\pm</math> 303</b>       | <b>352 <math>\pm</math> 368</b>                |
| <b>Starch intake (g/day) – median <math>\pm</math> IQR<sup>c</sup></b>    | <b>286 <math>\pm</math> 164</b>       | <b>311 <math>\pm</math> 217</b>                |
| <i>Study City:</i>                                                        |                                       |                                                |
| <b>Hamilton – no./total no. (%)</b>                                       | <b>29/160 (18)</b>                    | <b>188/640 (29)</b>                            |
| <b>Vancouver – no./total no. (%)</b>                                      | <b>59/160 (37)</b>                    | <b>141/640 (22)</b>                            |
| <b>Quebec City – no./total no. (%)</b>                                    | <b>46/160 (29)</b>                    | <b>154/640 (24)</b>                            |
| <b>Ottawa – no./total no. (%)</b>                                         | <b>26/160 (16)</b>                    | <b>157/640 (25)</b>                            |
| Sodium intake from FFQ (g) <sup>d</sup> – median $\pm$ IQR <sup>d</sup>   | 2.6 $\pm$ 1.2                         | 2.8 $\pm$ 1.3                                  |
| Current alcohol consumer – no./total no. (%)                              | 136/160 (85)                          | 517/640 (81)                                   |
| Current smoker – no./total no. (%)                                        | 11/159 (7)                            | 48/636 (8)                                     |
| AHEI Score <sup>e</sup>                                                   | 40 $\pm$ 14                           | 39 $\pm$ 13                                    |
| Location – urban:rural                                                    | 138:22                                | 547:93                                         |

<sup>a</sup> Q1: n=135 and Q2-5: n=578.<sup>b</sup> Q1: n=154 and Q2-5: n=622.<sup>c</sup> Q1: n=150 and Q2-5: n=609.<sup>d</sup> Q1: n=149 and Q2-5: n=618.<sup>e</sup> Q1: n=149 and Q2-5: n=617.

**Table S4.** Spearman rank correlation analysis of dietary variables associated with daily iodine excretion ( $\mu\text{g/day}$ ) of PURE-24USE participants from the four different sites in Canada after excluding for iodine supplement and/or T4 use.

| Dietary Intake                  | PURE Study Site                 |                             |                                  |                       |                                    |                             |                               |                             | Total<br>(224 µg/day; n=611) |                             |
|---------------------------------|---------------------------------|-----------------------------|----------------------------------|-----------------------|------------------------------------|-----------------------------|-------------------------------|-----------------------------|------------------------------|-----------------------------|
|                                 | Hamilton<br>(257 µg/day; n=162) |                             | Vancouver<br>(189 µg/day; n=137) |                       | Quebec City<br>(191 µg/day; n=173) |                             | Ottawa<br>(260 µg/day; n=139) |                             |                              |                             |
|                                 | <i>r</i>                        | <i>p</i> -value             | <i>r</i>                         | <i>p</i> -value       | <i>r</i>                           | <i>p</i> -value             | <i>r</i>                      | <i>p</i> -value             | <i>r</i>                     | <i>p</i> -value             |
| Dairy (g/day)                   | <b>0.39**</b>                   | <b>2.15×10<sup>-7</sup></b> | 0.15                             | 7.30×10 <sup>-2</sup> | 0.09                               | 0.266                       | <b>0.34**</b>                 | <b>4.33×10<sup>-5</sup></b> | <b>0.24**</b>                | <b>2.38×10<sup>-9</sup></b> |
| Bread and cereal (g/day)        | <b>0.18*</b>                    | <b>2.02×10<sup>-2</sup></b> | 0.002                            | 0.984                 | <b>0.15*</b>                       | <b>5.31×10<sup>-2</sup></b> | 0.05                          | 0.586                       | <b>0.10*</b>                 | <b>1.63×10<sup>-2</sup></b> |
| Processed food (g/day)          | 0.05                            | 0.565                       | 0.01                             | 0.953                 | <b>0.22**</b>                      | <b>4.22×10<sup>-3</sup></b> | 0.04                          | 0.669                       | <b>0.11**</b>                | <b>7.93×10<sup>-3</sup></b> |
| Red and proc. meat (g/day)      | 0.10                            | 0.208                       | 0.07                             | 0.447                 | <b>0.16*</b>                       | <b>3.97×10<sup>-2</sup></b> | 0.01                          | 0.902                       | 0.06                         | 0.151                       |
| Red meat only (g/day)           | 0.13                            | 9.66×10 <sup>-2</sup>       | 0.08                             | 0.338                 | 0.14                               | 6.05×10 <sup>-2</sup>       | -0.01                         | 0.946                       | 0.06                         | 0.171                       |
| Processed meat (g/day)          | -0.07                           | 0.378                       | -0.04                            | 0.613                 | 0.12                               | 0.118                       | 0.06                          | 0.508                       | 0.02                         | 0.679                       |
| White meat only (g/day)         | 0.03                            | 0.679                       | 0.03                             | 0.701                 | 0.04                               | 0.569                       | -0.03                         | 0.746                       | 0.02                         | 0.607                       |
| Vegetable (g/day)               | <b>0.16*</b>                    | <b>4.88×10<sup>-2</sup></b> | -0.07                            | 0.440                 | -0.01                              | 0.910                       | 0.04                          | 0.686                       | 0.01                         | 0.802                       |
| Green leafy veg. (g/day)        | 0.12                            | 0.125                       | -0.16                            | 5.92×10 <sup>-2</sup> | -0.08                              | 0.318                       | 0.05                          | 0.602                       | -0.004                       | 0.923                       |
| Cruciferous veg. (g/day)        | 0.11                            | 0.156                       | 0.02                             | 0.779                 | 0.08                               | 0.316                       | 0.07                          | 0.437                       | 0.03                         | 0.467                       |
| Dark leafy veg. (g/day)         | 0.07                            | 0.376                       | -0.07                            | 0.415                 | 0.02                               | 0.783                       | -0.02                         | 0.853                       | -0.01                        | 0.800                       |
| Egg (g/day)                     | 0.05                            | 0.568                       | -0.02                            | 0.842                 | 0.12                               | 0.129                       | -0.08                         | 0.345                       | 0.05                         | 0.239                       |
| Fruit (g/day)                   | 0.04                            | 0.605                       | -0.03                            | 0.729                 | 0.004                              | 0.961                       | -0.09                         | 0.270                       | -0.02                        | 0.676                       |
| Fish (g/day)                    | -0.03                           | 0.686                       | -0.06                            | 0.454                 | 0.02                               | 0.812                       | 0.02                          | 0.796                       | -0.02                        | 0.709                       |
| Salty food (g/day) <sup>a</sup> | -0.01                           | 0.914                       | -0.14                            | 0.107                 | 0.10                               | 0.183                       | -0.02                         | 0.844                       | 0.004                        | 0.925                       |

Participants taking iodine containing supplements and thyroxine (T4) were excluded from the analysis, where *r* denotes the Spearman rank correlation coefficient.

\*\*Correlation is significant at the 0.01 level (2-tailed).

\* Correlation is significant at the 0.05 level (2-tailed).

**Table S5.** Spearman rank correlation analysis of dietary variables associated with daily thiocyanate excretion ( $\mu\text{g/day}$ ) of participants across four different sites in the PURE-24USE study after excluding for current smokers, including Hamilton, Vancouver, Quebec City and Ottawa.

| Dietary Variable                      | Study Site                                 |                       |                                             |                 |                                               |                             |                                          |                             | Total (median=1354<br>µg/day; n=620) |                             |
|---------------------------------------|--------------------------------------------|-----------------------|---------------------------------------------|-----------------|-----------------------------------------------|-----------------------------|------------------------------------------|-----------------------------|--------------------------------------|-----------------------------|
|                                       | Hamilton<br>(median=1251<br>µg/day; n=176) |                       | Vancouver<br>(median=1272<br>µg/day; n=152) |                 | Quebec City<br>(median=1718<br>µg/day; n=136) |                             | Ottawa<br>(median=1281<br>µg/day; n=156) |                             |                                      |                             |
|                                       | <i>r</i>                                   | <i>p</i> -value       | <i>r</i>                                    | <i>p</i> -value | <i>r</i>                                      | <i>p</i> -value             | <i>r</i>                                 | <i>p</i> -value             | <i>r</i>                             | <i>p</i> -value             |
|                                       |                                            |                       |                                             |                 |                                               |                             |                                          |                             |                                      |                             |
| Processed meat intake (g/day)         | 0.04                                       | 0.645                 | 0.04                                        | 0.642           | 0.16                                          | 6.53×10 <sup>-2</sup>       | 0.12                                     | 0.136                       | <b>0.10*</b>                         | <b>1.85×10<sup>-2</sup></b> |
| Red and processed meat intake (g/day) | 0.04                                       | 0.613                 | 0.09                                        | 0.280           | -0.01                                         | 0.889                       | 0.13                                     | 0.108                       | <b>0.09*</b>                         | <b>2.03×10<sup>-2</sup></b> |
| Cruciferous vegetable intake (g/day)  | 0.11                                       | 0.147                 | 0.13                                        | 0.103           | 0.01                                          | 0.917                       | 0.05                                     | 0.541                       | <b>0.09*</b>                         | <b>2.08×10<sup>-2</sup></b> |
| Egg intake (g/day)                    | 0.13                                       | 8.18×10 <sup>-2</sup> | 0.08                                        | 0.352           | <b>0.18*</b>                                  | <b>3.86×10<sup>-2</sup></b> | 0.05                                     | 0.512                       | <b>0.09*</b>                         | <b>3.30×10<sup>-2</sup></b> |
| Starch (g/day)                        | 0.03                                       | 0.743                 | 0.05                                        | 0.582           | -0.09                                         | 0.305                       | <b>0.16*</b>                             | <b>4.47×10<sup>-2</sup></b> | 0.050                                | 0.232                       |

Participants who self-reported as currently smoking were excluded from the analysis, where *r* denotes the Spearman rank correlation coefficient.

\*\*Correlation is significant at the 0.01 level (2-tailed).

\* Correlation is significant at the 0.05 level (2-tailed).

Significant *p*-values at the 0.01 and 0.05 levels are bolded.

**Table S6.** Spearman rank correlation analysis of dietary variables associated with daily nitrate excretion (mg/day) of participants across from four different sites in the PURE-24USE study, including Hamilton, Vancouver, Quebec City and Ottawa.

| Dietary Variable                     | Study Site                             |                             |                                         |         |                                           |                             |                                      |                             | Total (median=147 mg/day; n=759) |                             |
|--------------------------------------|----------------------------------------|-----------------------------|-----------------------------------------|---------|-------------------------------------------|-----------------------------|--------------------------------------|-----------------------------|----------------------------------|-----------------------------|
|                                      | Hamilton<br>(median=133 mg/day; n=207) |                             | Vancouver<br>(median=157 mg/day; n=173) |         | Quebec City<br>(median=162 mg/day; n=197) |                             | Ottawa<br>(median=137 mg/day; n=182) |                             |                                  |                             |
|                                      | r                                      | p-value                     | r                                       | p-value | r                                         | p-value                     | r                                    | p-value                     | r                                | p-value                     |
|                                      |                                        |                             |                                         |         |                                           |                             |                                      |                             |                                  |                             |
| Vegetable intake (g/day)             | <b>0.27**</b>                          | <b>1.14×10<sup>-4</sup></b> | 0.09                                    | 0.217   | 0.14                                      | 5.90×10 <sup>-2</sup>       | 0.10                                 | 0.163                       | <b>0.17**</b>                    | <b>2.46×10<sup>-6</sup></b> |
| Green leafy vegetable intake (g/day) | <b>0.25**</b>                          | <b>3.42×10<sup>-4</sup></b> | 0.10                                    | 0.173   | <b>0.14*</b>                              | <b>4.86×10<sup>-2</sup></b> | 0.11                                 | 0.126                       | <b>0.15**</b>                    | <b>2.90×10<sup>-5</sup></b> |
| Other vegetable intake (g/day)       | <b>0.16*</b>                           | <b>2.25×10<sup>-2</sup></b> | 0.07                                    | 0.359   | 0.12                                      | 9.69×10 <sup>-2</sup>       | 0.03                                 | 0.675                       | <b>0.11**</b>                    | <b>2.77×10<sup>-3</sup></b> |
| Cruciferous vegetable intake (g/day) | <b>0.19**</b>                          | <b>6.68×10<sup>-3</sup></b> | -0.06                                   | 0.399   | 0.01                                      | 0.866                       | 0.06                                 | 0.393                       | <b>0.07*</b>                     | <b>4.99×10<sup>-2</sup></b> |
| Fruit intake (g/day)                 | 0.13                                   | 6.49×10 <sup>-2</sup>       | -0.04                                   | 0.646   | <b>0.19**</b>                             | <b>7.50×10<sup>-3</sup></b> | 0.01                                 | 0.891                       | <b>0.07*</b>                     | <b>4.20×10<sup>-2</sup></b> |
| Processed meat intake (g/day)        | <b>-0.18**</b>                         | <b>9.37×10<sup>-3</sup></b> | -0.09                                   | 0.228   | <b>0.21**</b>                             | <b>3.70×10<sup>-3</sup></b> | -0.003                               | 0.963                       | -0.02                            | 0.600                       |
| Processed food intake (g/day)        | <b>-0.17*</b>                          | <b>1.76×10<sup>-2</sup></b> | -0.02                                   | 0.812   | 0.04                                      | 0.540                       | -0.07                                | 0.355                       | <b>-0.08*</b>                    | <b>3.97×10<sup>-2</sup></b> |
| Dark yellow vegetable intake (g/day) | <b>0.16*</b>                           | <b>1.83×10<sup>-2</sup></b> | 0.03                                    | 0.734   | 0.02                                      | 0.811                       | -0.06                                | 0.417                       | 0.06                             | 0.105                       |
| Starch intake (g/day)                | 0.08                                   | 0.266                       | -0.10                                   | 0.191   | 0.04                                      | 0.603                       | <b>0.19**</b>                        | <b>8.94×10<sup>-3</sup></b> | 0.05                             | 0.148                       |

*r* denotes the Spearman rank correlation coefficient.

\*\*Correlation is significant at the 0.01 level (2-tailed).

\* Correlation is significant at the 0.05 level (2-tailed).

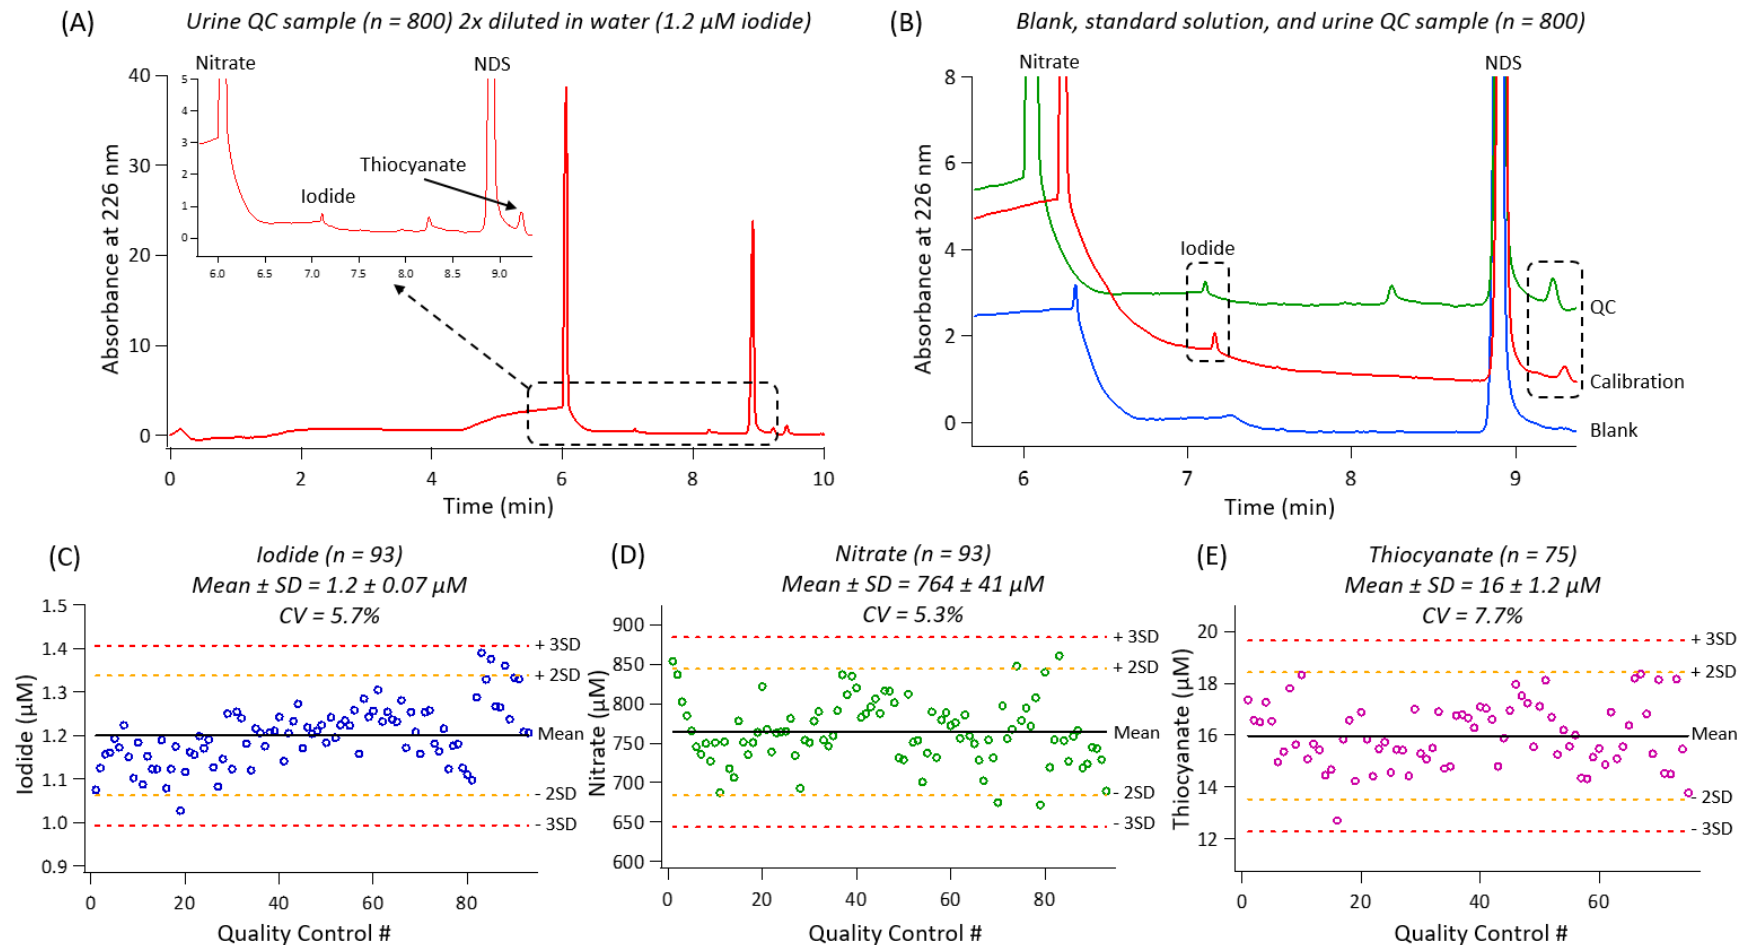

**Figure S1.** Representative electropherogram overlay of (A) a pooled quality control ( $n=800$ ) and a comparison between a (B) quality control sample, calibrant solution, and blank solution. Also, control charts highlight reliable quantification of (C) iodide, (D) nitrate and (E) thiocyanate in 24 h urine samples with acceptable reproducibility (CV < 8%).
